# Supplementary material
Source: PubMed Central journal article supplement (PMC3576205)
Supplement: NIHMS429044-supplement-1.pdf [file NIHMS429044-supplement-1.pdf]

ONLINE SUPPLEMENT

**Hemodynamic and Hormonal Changes to Dual Renin Angiotensin System  
Inhibition in Experimental Hypertension**

Norihito Moniwa<sup>1</sup>, Jasmina Varagic<sup>1,2,3</sup>, Sarfaraz Ahmad<sup>1</sup>, Jessica L. VonCannon<sup>1</sup>,  
Stephen W. Simington<sup>1</sup>, Hao Wang<sup>4</sup>, Leanne Groban<sup>2,4</sup>,  
K. Bridget Brosnihan<sup>2,3</sup>, Sayaka Nagata<sup>6</sup>, Johji Kato<sup>7</sup>, Kazuo Kitamura<sup>6</sup>,  
R. Ariel Gomez<sup>8</sup>, Maria L. Sequeira Lopez<sup>8</sup>, and Carlos M. Ferrario<sup>1,3,5</sup>

<sup>1</sup>Division of Surgical Sciences, <sup>2</sup>Hypertension and Vascular Research Center,  
<sup>3</sup>Department of Physiology and Pharmacology, <sup>4</sup>Department of Anesthesiology,  
<sup>5</sup>Internal Medicine/Nephrology Wake Forest University School of Medicine Winston-  
Salem, NC 27157, USA

<sup>6</sup>Division of Circulatory and Body Fluid Regulation Faculty of Medicine, <sup>7</sup>Frontier  
Science Research Center, University of Miyazaki, Miyazaki Japan,

<sup>8</sup>Department of Pediatric, Division of Nephrology, University of Virginia Health System,  
Charlottesville, VA

Short Title: *Combination of Valsartan/Aliskiren*

Address for Correspondence:  
Norihito Moniwa, MD, Ph.D.  
Department of Surgery  
Wake Forest University School of Medicine  
Winston Salem, NC 27157  
Phone: 336-716-2234  
Fax: 336-716-6644  
Email: [nmoniwa@wakehealth.edu](mailto:nmoniwa@wakehealth.edu)

Supplemental Tables and Figures

**Table S1. Effects of treatments on RAS components in plasma, left ventricle and kidney cortex**

| Variable                           | Vehicle<br>(n=9) | Valsartan<br>(n=10)       | Combination<br>(n=10)     |
|------------------------------------|------------------|---------------------------|---------------------------|
| Plasma                             |                  |                           |                           |
| Ang-(1-12), <i>fmol/mL</i>         | 159.5 ± 5.2      | 170.3 ± 10.1              | 173.6 ± 8.5               |
| Left ventricle                     |                  |                           |                           |
| Ang-(1-12), <i>fmol/mg protein</i> | 25.3 ± 2.7       | 20.6 ± 1.8                | 26.7 ± 3.1                |
| Ang II, <i>fmol/mg protein</i>     | 16.1 ± 1.9       | 14.2 ± 1.5                | 16.2 ± 2.2                |
| Ang-(1-7), <i>fmol/mg protein</i>  | 14.5 ± 1.6       | 15.7 ± 1.4                | 15.7 ± 1.9                |
| ACE mRNA, <i>units</i>             | 1.00 ± 0.06      | 0.88 ± 0.03               | 0.81 ± 0.03               |
| ACE2 mRNA, <i>units</i>            | 1.00 ± 0.06      | 0.85 ± 0.06               | 0.81 ± 0.07               |
| Kidney cortex                      |                  |                           |                           |
| Ang-(1-12), <i>fmol/mg protein</i> | 147.0 ± 17.0     | 134.8 ± 10.0              | 179.8 ± 8.9 <sup>†</sup>  |
| Ang II, <i>fmol/mg protein</i>     | 24.8 ± 2.3       | 12.9 ± 0.5 <sup>***</sup> | 12.0 ± 1.2 <sup>***</sup> |
| Ang-(1-7), <i>fmol/mg protein</i>  | 12.9 ± 0.9       | 12.7 ± 0.5                | 13.0 ± 1.3                |
| ACE mRNA, <i>units</i>             | 1.00 ± 0.10      | 1.11 ± 0.06               | 0.92 ± 0.06               |
| ACE2 mRNA, <i>units</i>            | 1.00 ± 0.09      | 1.04 ± 0.07               | 0.75 ± 0.09 <sup>†</sup>  |

Values are means ± SEM. mRNA values , relative gene expression as described in

Methods. †: P<0.05 vs valsartan, \*\*\*: P<0.001 vs vehicle

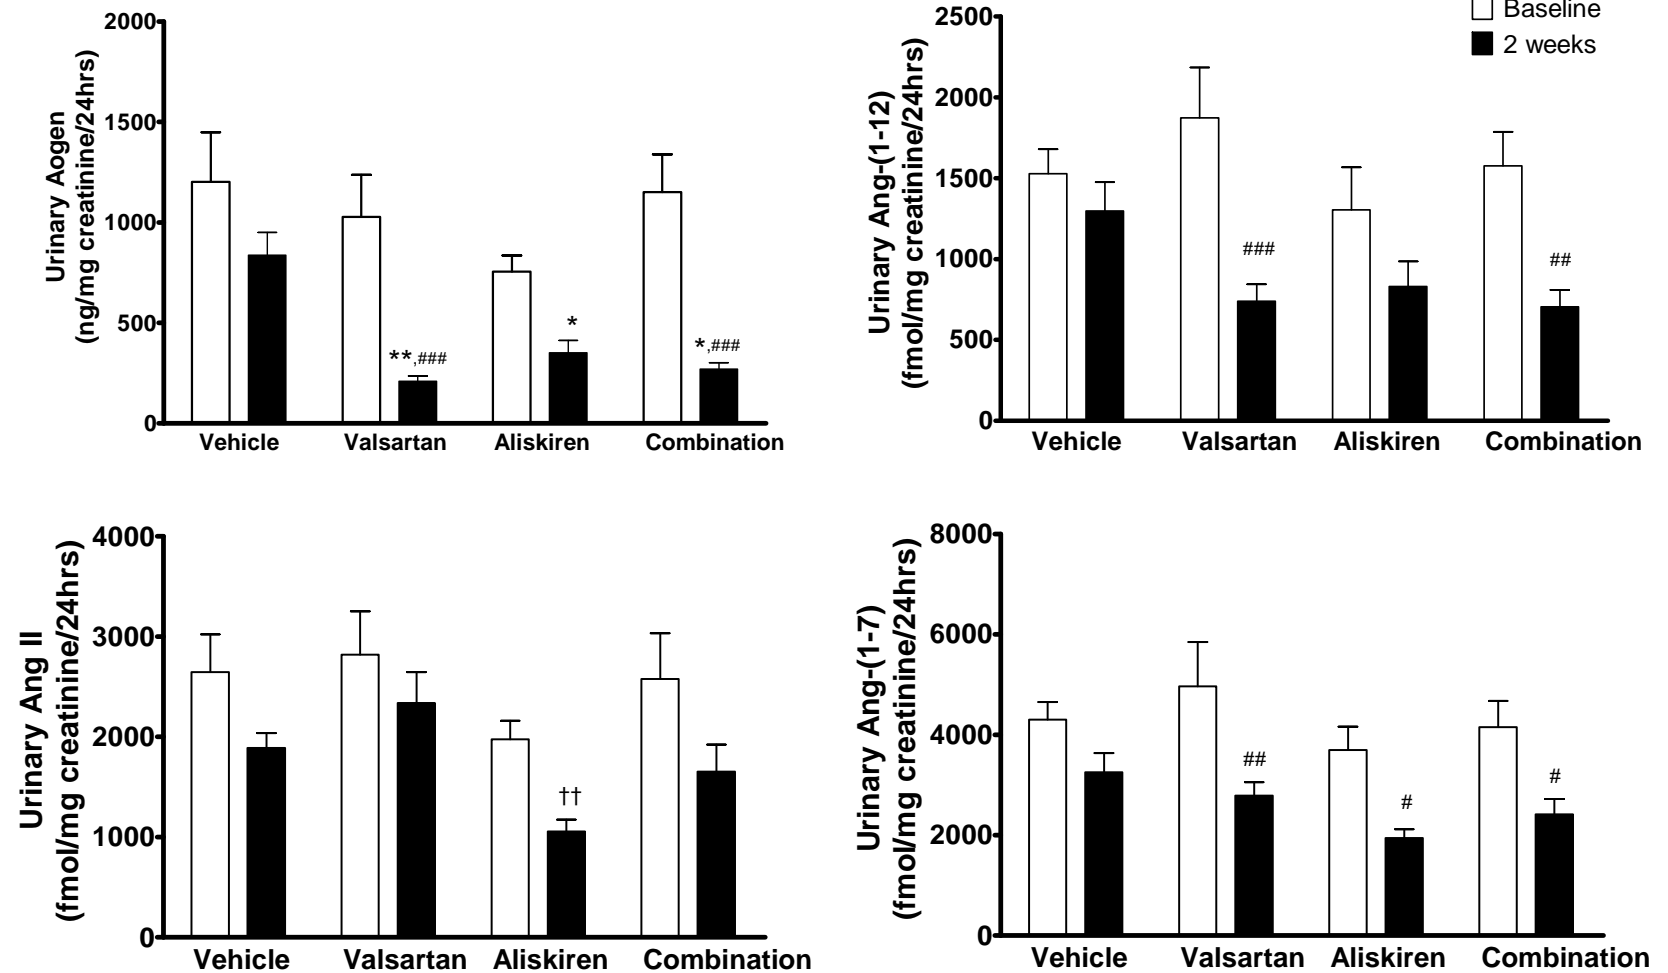

**Figure S1.** Patterns of urinary excretion rates of angiotensinogen (Aogen), angiotensin-(1-12) [Ang-(1-12)], Ang II, and Ang-(1-7) in mRen2.Lewis rats medicated with valsartan, aliskiren, or the combination of valsartan/aliskiren. Values are means ± SEM. \*: P<0.05 vs vehicle, #: P<0.05 vs before treatment, \*\*: P<0.01 vs vehicle, ††: P<0.01 vs valsartan, ###:

P<0.01 vs before treatment, ###: P<0.001 vs before treatment.

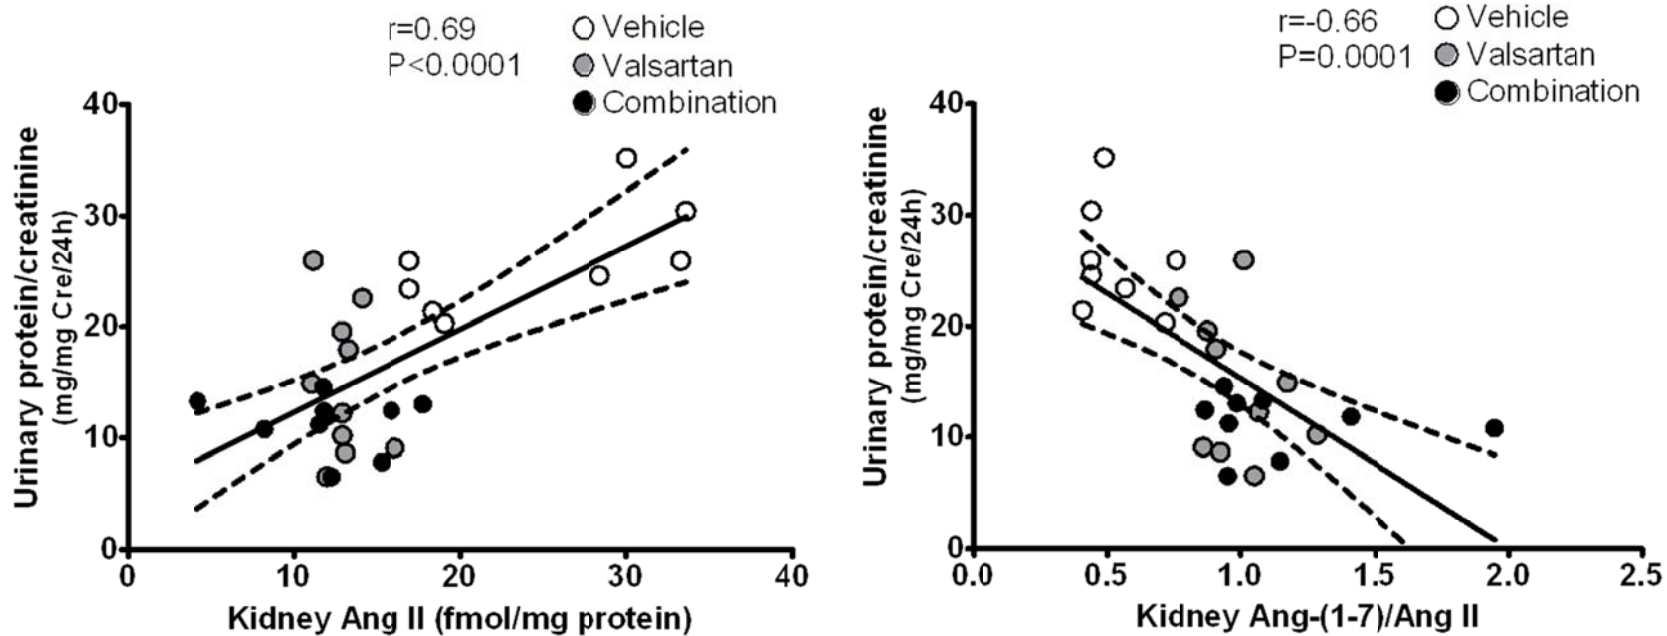

**Figure S2.** Correlations between urinary protein/creatinine ratio and kidney Ang II level (left panel) or kidney Ang-(1-7)/Ang II ratio (right panel).
